# Supplementary material for: BioBits™ Bright: A fluorescent synthetic biology education kit
Source: PubMed Central journal article supplement — Sci Adv. 2018 Aug 1;4(8):eaat5107. doi: 10.1126/sciadv.aat5107 (PMC6070313; doi:10.1126/sciadv.aat5107), 2018-08-01
Supplement: aat5107_SM.pdf [file aat5107_SM.pdf]

## Supplementary Materials for

### **BioBits™ Bright: A fluorescent synthetic biology education kit**

Jessica C. Stark, Ally Huang, Peter Q. Nguyen, Rachel S. Dubner, Karen J. Hsu, Thomas C. Ferrante, Mary Anderson, Ada Kanapskyte, Quinn Mucha, Jessica S. Packett, Palak Patel, Richa Patel, Deema Qaq, Tyler Zondor, Julie Burke, Thomas Martinez, Ashlee Miller-Berry, Aparna Puppala, Kara Reichert, Miriam Schmid, Lance Brand, Lander R. Hill, Jemima F. Chellaswamy, Nuhie Faheem, Suzanne Fetherling, Elissa Gong, Eddie Marie Gonzalzes, Teresa Granito, Jenna Koritsaris, Binh Nguyen, Sujud Ottman, Christina Palffy, Angela Patel, Sheila Skweres, Adriane Slaton, TaRhonda Woods, Nina Donghia, Keith Pardee, James J. Collins\*, Michael C. Jewett\*

\*Corresponding author. Email: jimjc@mit.edu (J.J.C.); m-jewett@northwestern.edu (M.C.J.)

Published 1 August 2018, *Sci. Adv.* 4, eaat5107 (2018)  
DOI: 10.1126/sciadv.aat5107

#### **The PDF file includes:**

Fig. S1. Diversity of the fluorescent protein library facilitates evolution curriculum.  
Fig. S2. Fluorescent protein library expresses with soluble, full-length products observed by SDS-PAGE and autoradiogram.  
Fig. S3. FD-CF reactions tolerate a range of incubation temperatures.  
Fig. S4. DNA template is not limiting for in vitro sfGFP synthesis due to relatively high initial rates of protein synthesis.  
Fig. S5. Orange and yellow filters enable imaging of diverse fluorescent proteins in portable imagers.  
Fig. S6. FD-CF reactions can be run in a laboratory-free environment using low-cost, portable imagers and incubators.  
Fig. S7. Standard curves for converting fluorescence to protein concentrations.  
Table S1. Cost analysis of portable imagers and incubators.  
Table S2. Cost analysis for BioBits™ Bright.  
Table S3. Cost analysis of FD-CF reactions.  
Table S4. Plasmids used in this study.  
Legends for curricula S1 to S5  
Legend for data S1  
Legend for folder S1

#### **Other Supplementary Material for this manuscript includes the following:**

(available at [advances.sciencemag.org/cgi/content/full/4/8/eaat5107/DC1](https://advances.sciencemag.org/cgi/content/full/4/8/eaat5107/DC1))

Curriculum S1 (Microsoft Word format). Let it glow!  
Curriculum S2 (Microsoft Word format). What factors affect CFPS yields?

Curriculum S3 (Microsoft Word format). Synthetic biology: Looking to nature to engineer new designs.

Curriculum S4 (Microsoft Word format). How fast is it really?

Curriculum S5 (Microsoft Word format). Super power protein!

Data S1 (Microsoft Excel format). This file contains example student-generated fluorescence data from the tunable protein expression laboratory activity (Fig. 3) and includes time-course data for modeling protein synthesis as an enzymatic reaction with varying amounts of substrate (DNA template).

Folder S1 (.zip format). This folder contains FreeCAD files and circuit diagrams to enable user construction of portable imagers and incubators.

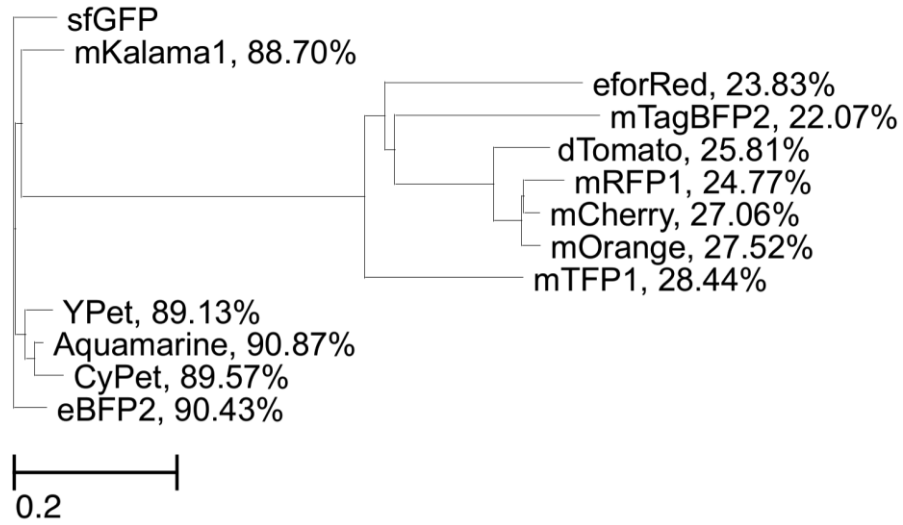

**Fig. S1. Diversity of the fluorescent protein library facilitates evolution curriculum.**

Phylogenetic tree representing the amino acid sequences of the fluorescent protein library used in this study. The tree was constructed using the ETE toolkit in Python using the neighbor-joining method with results from a Clustal Omega multiple sequence alignment. Percentages represent the amino acid sequence homology to the standard CFPS reporter sfGFP.

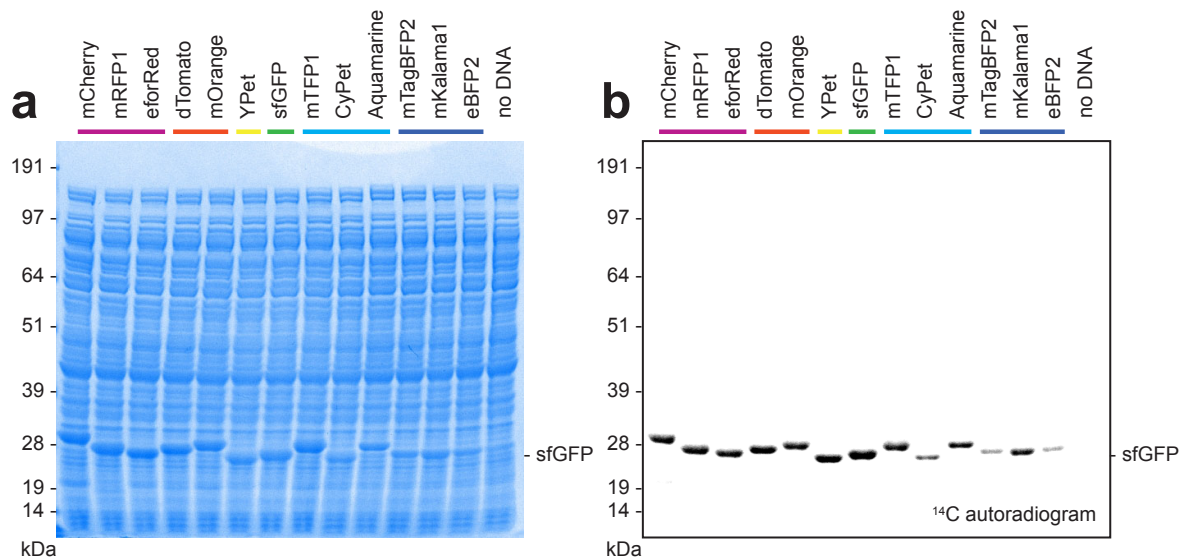

**Fig. S2. Fluorescent protein library expresses with soluble, full-length products observed by SDS-PAGE and autoradiogram.** Following cell-free protein synthesis for 20 hours at 30°C, reactions containing <sup>14</sup>C-leucine were centrifuged at 20,000xg for 10 min to remove insoluble or aggregated protein products. Soluble fractions were then analyzed by **(a)** SDS-PAGE and **(b)** <sup>14</sup>C-autoradiogram. Uncropped versions of both images are shown. All library members expressed with exclusively full-length product observable by both SDS-PAGE and autoradiogram.

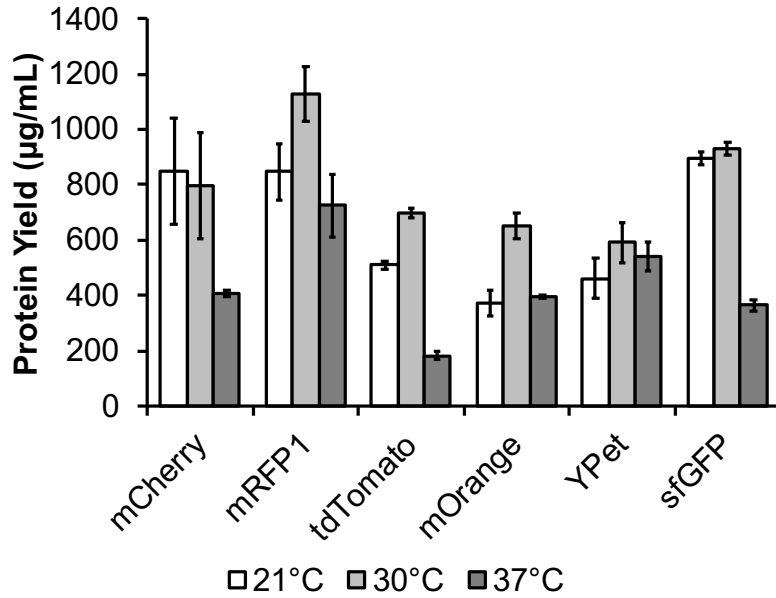

**Fig. S3. FD-CF reactions tolerate a range of incubation temperatures.** FD-CF reactions containing DNA template encoding mCherry, mRFP1, dTomato, mOrange, YPet, sfGFP were incubated at 37°C, 30°C, or 21°C. Reactions incubated at 37°C and 30°C were run for 20 hours, while reactions incubated at 21°C were run for 40 hours. Values represent averages and error bars represent standard deviations of N=3 biological replicates.

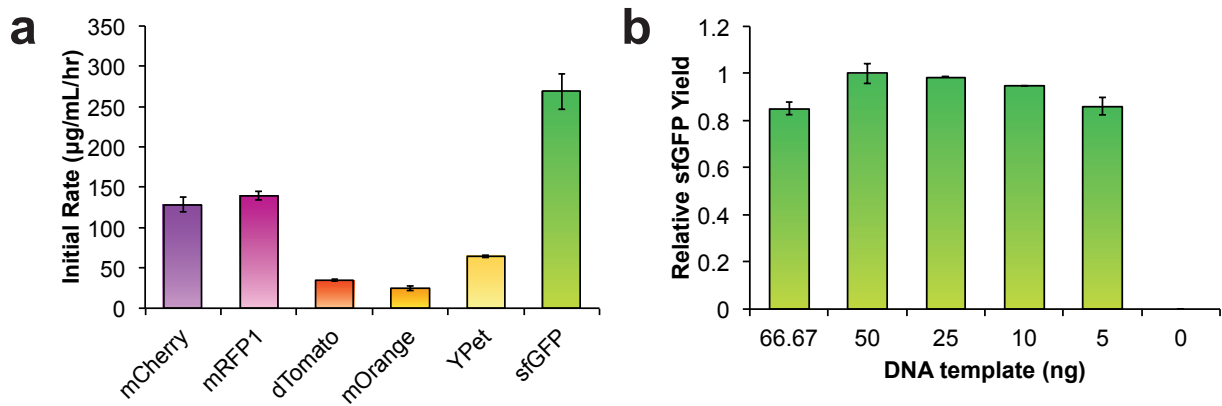

**Fig. S4. DNA template is not limiting for in vitro sfGFP synthesis due to relatively high initial rates of protein synthesis.** FD-CF reactions containing DNA template encoding mCherry, mRFP1, dTomato, mOrange, YPet, sfGFP were incubated at 30°C for 20 hours. **(a)** Initial rates of protein synthesis from reactions containing 66.67 ng DNA template were measured by fluorescence. **(b)** Endpoint yields for sfGFP synthesis measured *via* fluorescence at 20 hours show that protein synthesis is not limited by DNA template concentration. Values represent averages and error bars represent average errors of  $N \geq 2$  biological replicates.

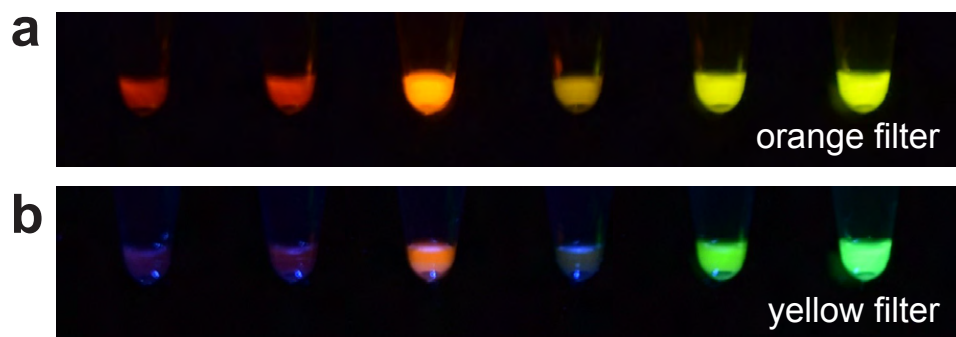

**Fig. S5. Orange and yellow filters enable imaging of diverse fluorescent proteins in portable imagers.** We constructed filters out of both translucent orange and yellow acrylic to visualize our fluorescent protein library. Red fluorescent proteins fluoresce more brightly through the orange filter **(a)** and yellow/green proteins appear brighter using the yellow filter **(b)**. Pictured are FD-CF reactions producing, from left to right, mCherry, mRFP1, dTomato, mOrange, YPet, and sfGFP.

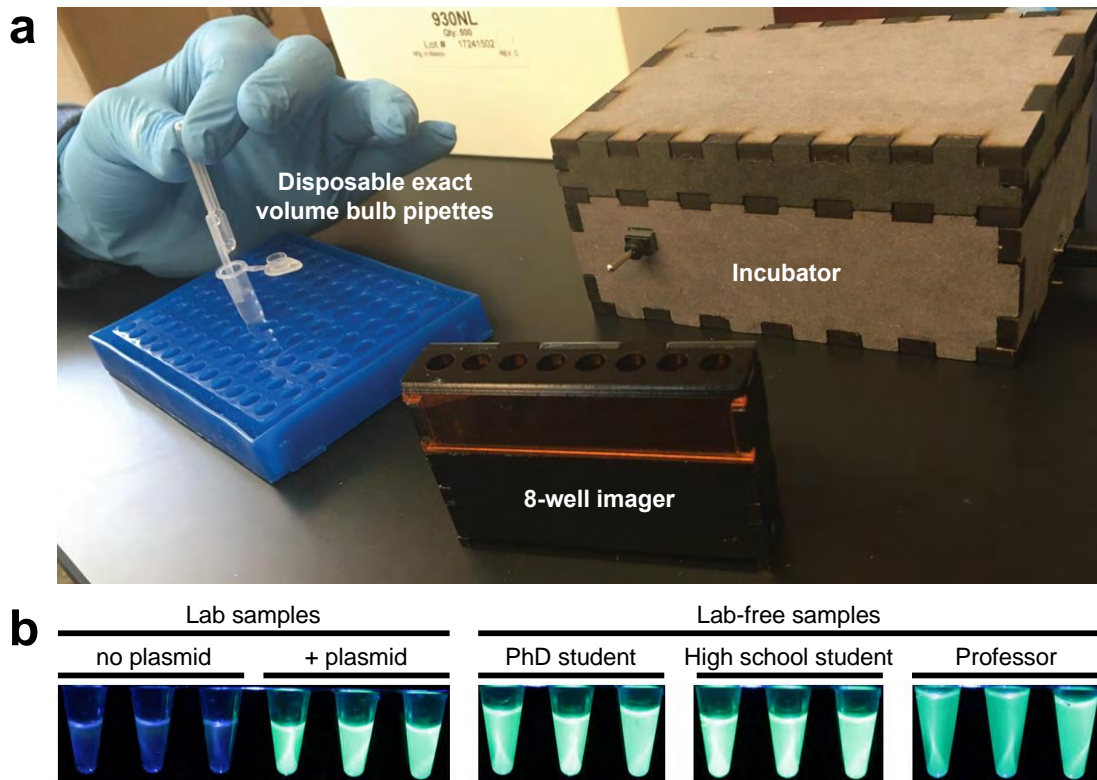

**Fig. S6. FD-CF reactions can be run in a laboratory-free environment using low-cost, portable imagers and incubators. (a)** Equipment used in “lab-free” experiments, including disposable 50  $\mu$ L transfer pipettes, a portable imager, and a portable incubator. **(b)** sfGFP expression is visually consistent across different experiments and different operators. All images of reactions are scaled identically; variations in the volume of the reactions are due to pipetting differences across individual operators.



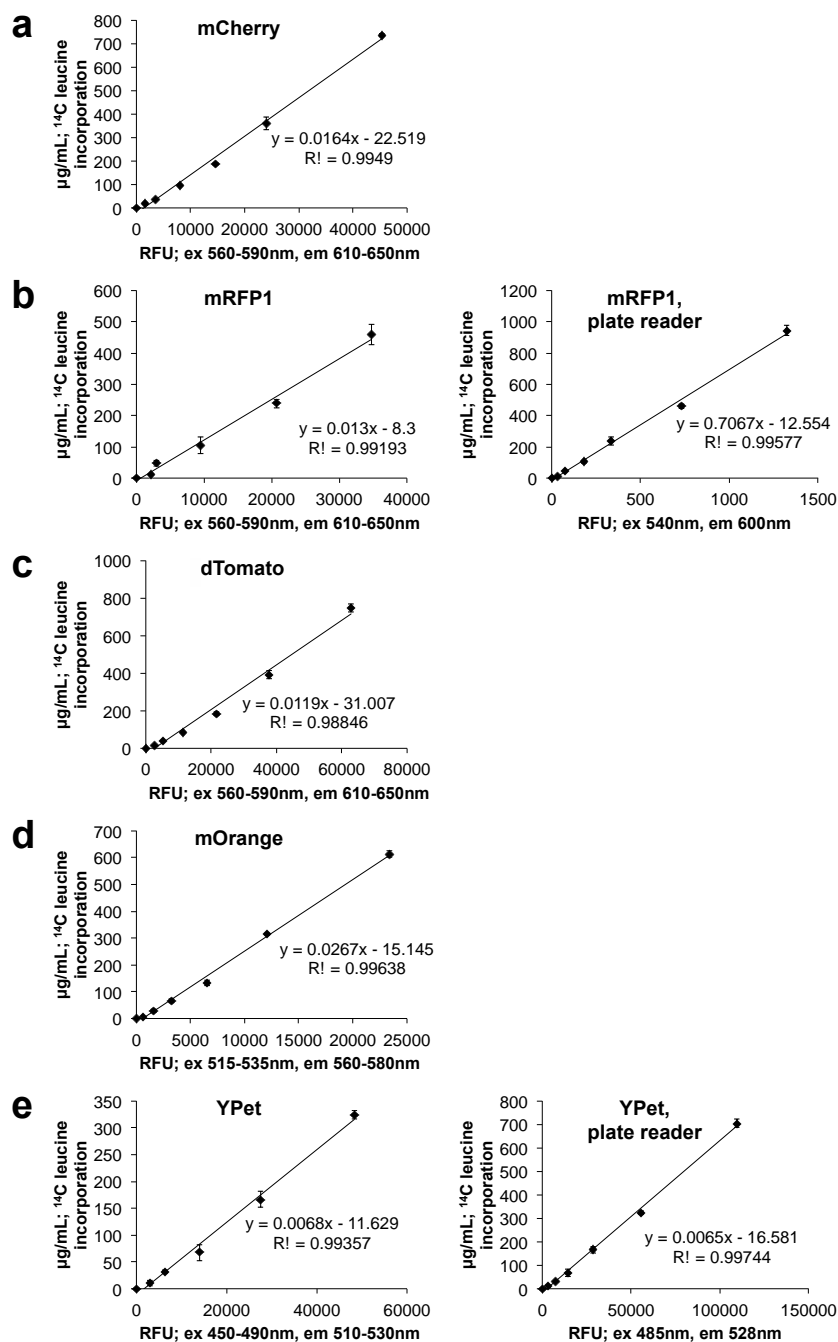

**Fig. S7. Standard curves for converting fluorescence to protein concentrations.** Standard curves were generated by correlating protein yields from serial dilutions of FD-CF reactions containing <sup>14</sup>C-leucine with measured fluorescence. Standard curves are shown for **(a)** mCherry, **(b)** mRFP1, **(c)** dTomato, **(d)** mOrange, and **(e)** YPet. Fluorescence was measured using a RT-PCR thermocycler unless fluorescence saturated the detector. If this was the case, fluorescence was measured using a plate reader after diluting reactions (4 µL FD-CF with 46 µL water for mRFP1 and 2 µL FD-CF with 48 µL water for YPet). Values represent means and error bars represent average errors of N=2 measurements.

**Table S1. Cost analysis of portable imagers and incubators.** The total cost to build working prototypes of our portable 8-well imager, 96-well imager, and incubator (switch and dial versions) are calculated below. Purchasing information for materials used to construct the prototypes are also included.

| <b>Component</b>                 | <b>Cost (\$/unit)</b> | <b>Manufacturer</b> | <b>Product No</b> |
|----------------------------------|-----------------------|---------------------|-------------------|
| <b>8-well Imager Total</b>       | <b>14.13</b>          |                     |                   |
| Black acrylic                    | 0.95                  | Inventables         | 24112-03          |
| Transparent yellow acrylic       | 0.12                  | Inventables         | 24165-03          |
| Transparent orange acrylic       | 0.12                  | Inventables         | 24164-03          |
| SCIGRIP Weld-On 16 Cement        | 0.12                  | TAP Plastics        | 10886             |
| 448 nm blue LED                  | 6.97                  | Luxeon Star LEDs    | SP-05-V4          |
| Thermal adhesive tape for LEDs   | 0.94                  | Luxeon Star LEDs    | LXT-R-10          |
| Aluminum                         | 0.35                  | McMaster-Carr       | 9146T38           |
| Battery pack (3 AAA) with switch | 1.56                  | Digi-Key            | SBH431-1AS-ND     |
| AAA rechargeable batteries       | 3.00                  | Amazon              | RFQ420            |
| <b>96-well Imager Total</b>      | <b>32.01</b>          |                     |                   |
| Black acrylic                    | 7.05                  | Inventables         | 24112-01          |
| Transparent yellow acrylic       | 0.85                  | Inventables         | 24165-03          |
| Transparent orange acrylic       | 0.85                  | Inventables         | 24164-03          |
| SCIGRIP Weld-On 16 Cement        | 0.29                  | TAP Plastics        | 10886             |
| 448 nm blue LEDs (2)             | 13.94                 | Luxeon Star LEDs    | SP-05-V4          |
| Thermal adhesive tape for LEDs   | 3.77                  | Luxeon Star LEDs    | LXT-R-10          |
| Aluminum                         | 0.70                  | McMaster-Carr       | 9146T38           |
| Battery pack (3 AAA) with switch | 1.56                  | Digi-Key            | SBH431-1AS-ND     |
| AAA rechargeable batteries       | 3.00                  | Amazon              | RFQ420            |
| <b>Switch Incubator Total</b>    | <b>19.79</b>          |                     |                   |
| Black medium-density fiberboard  | 5.67                  | Inventables         | 30463-04          |
| Screw, 0.25 in                   | 1.20                  | Inventables         | 25297-01          |
| Gorilla® wood glue               | 0.20                  | Inventables         | 26032-01          |
| Mini solder-able breadboard      | 2.95                  | SparkFun            | PRT-12702         |
| N-channel MOSFET                 | 0.95                  | SparkFun            | COM-10213         |
| Heating pad                      | 3.95                  | SparkFun            | COM-11288         |
| MicroB USB breakout              | 1.95                  | SparkFun            | BOB-12035         |
| 10K resistor                     | 0.10                  | Digi-Key            | 10.0KXBK-ND       |
| 1-20K resistor (2x)              | 0.20                  | Digi-Key            | variable          |
| 110K resistor (2x)               | 0.20                  | Digi-Key            | 110KXBK-ND        |
| Temperature sensor               | 1.84                  | Digi-Key            | TC622VAT-ND       |
| Switch                           | 0.58                  | Digi-Key            | EG1903-ND         |
| <b>Dial Incubator Total</b>      | <b>19.67</b>          |                     |                   |
| Black medium-density fiberboard  | 5.67                  | Inventables         | 30463-04          |
| Screw, 0.25 in                   | 1.20                  | Inventables         | 25297-01          |
| Gorilla® wood glue               | 0.20                  | Inventables         | 26032-01          |
| Mini solder-able breadboard      | 2.95                  | SparkFun            | PRT-12702         |
| N-channel MOSFET                 | 0.95                  | SparkFun            | COM-10213         |
| Heating pad                      | 3.95                  | SparkFun            | COM-11288         |
| MicroB USB breakout              | 1.95                  | SparkFun            | BOB-12035         |
| 10K resistor                     | 0.10                  | Digi-Key            | 10.0KXBK-ND       |
| 110K resistor                    | 0.10                  | Digi-Key            | 110KXBK-ND        |
| Temperature sensor               | 1.84                  | Digi-Key            | TC622VAT-ND       |
| Potentiometer                    | 0.76                  | Digi-Key            | 987-1726-ND       |

**Table S2. Cost analysis for BioBits™ Bright.** An estimate of the total cost to assemble BioBits™ Bright is calculated below. BioBits™ Bright will include enough reagents to run lab modules I and II for a 30-person classroom with groups of 2 students. The kit also includes our low-cost, portable imagers and incubators to enable use outside of a laboratory setting or in resource-limited classrooms. See **Table S3** for a detailed cost analysis of FD-CF reactions.

| <b>Component</b>                  | <b>Cost (\$/unit)</b> | <b>Quantity</b> | <b>Cost in Kit (\$)</b> | <b>Module</b> |
|-----------------------------------|-----------------------|-----------------|-------------------------|---------------|
| 5 µL FD-CF rxns                   | 0.05                  | 150             | 7.50                    | I             |
| 96-well FD-CF rxns                | 1.00                  | 15              | 15.00                   | II            |
| Incubator                         | 19.79                 | 1               | 19.79                   | I & II        |
| 8-well imager                     | 14.13                 | 1               | 14.13                   | I & II        |
| 96-well imager                    | 32.01                 | 1               | 32.01                   | I & II        |
| Freeze-dried plasmid (1200+ rxns) | 1.60                  | 6               | 9.60                    | I & II        |
| Nuclease-free water (mL)          | 0.04                  | 25              | 1.07                    | I & II        |
| <b>BioBits™ Bright Total</b>      |                       |                 | <b>99.10</b>            | <b>\$/kit</b> |

**Table S3. Cost analysis of FD-CF reactions.** The total cost to assemble FD-CF reactions is ~\$0.01 per  $\mu\text{L}$ . This comes out to ~\$0.05 per 5  $\mu\text{L}$  reaction used in the DNA titration module, or ~\$1.00 per 96 well plate used in the design-build-test module. In the table, amino acid cost accounts for 2 mM each of the 20 canonical amino acids purchased individually from Sigma. Extract cost is based on a single employee making 50 mL lysate from a 10 L fermentation, assuming 30 extract batches per year and a 5-year equipment lifetime. Component source is also included in the table if it is available to purchase directly from a supplier. Homemade or user-supplied components cannot be purchased directly and must be prepared by the end user according to procedures described in the Methods section.

| <b>Component</b>     | <b>Cost (\$/<math>\mu\text{L}</math> rxn)</b> | <b>Supplier</b>                          | <b>Product No</b> |
|----------------------|-----------------------------------------------|------------------------------------------|-------------------|
| Mg(Glu) <sub>2</sub> | negligible                                    | Sigma                                    | 49605             |
| NH <sub>4</sub> Glu  | negligible                                    | MP                                       | 02180595          |
| KGlu                 | negligible                                    | Sigma                                    | G1501             |
| ATP                  | negligible                                    | Sigma                                    | A2383             |
| GTP                  | 0.00026                                       | Sigma                                    | G8877             |
| UTP                  | 0.00022                                       | Sigma                                    | U6625             |
| CTP                  | 0.00019                                       | Sigma                                    | C1506             |
| Folinic acid         | 0.00002                                       | Sigma                                    | 47612             |
| tRNA                 | 0.00021                                       | Roche                                    | 10109541001       |
| Amino acids          | negligible                                    | Sigma                                    |                   |
| PEP                  | 0.00178                                       | Roche                                    | 10108294001       |
| NAD                  | negligible                                    | Sigma                                    | N8535-15VL        |
| CoA                  | 0.00033                                       | Sigma                                    | C3144             |
| Oxalic acid          | negligible                                    | Sigma                                    | P0963             |
| Putrescine           | negligible                                    | Sigma                                    | P5780             |
| Spermidine           | negligible                                    | Sigma                                    | S2626             |
| HEPES                | negligible                                    | Sigma                                    | H3375             |
| Extract              | 0.00737                                       | homemade                                 |                   |
| <b>Total</b>         | <b>0.01</b>                                   | <b>\$/<math>\mu\text{L}</math> rxn</b>   |                   |
|                      | <b>0.05</b>                                   | <b>\$/5 <math>\mu\text{L}</math> rxn</b> |                   |
|                      | <b>1.00</b>                                   | <b>\$/96 well plate</b>                  |                   |

**Table S4. Plasmids used in this study.** The source of the gene sequence and/or DNA used to construct each member of the fluorescent protein library is listed.

| Plasmid         | Sequence Source | Plasmid Source         | Addgene # |
|-----------------|-----------------|------------------------|-----------|
| pJL1 mCherry    | Clontech 632524 | This work              | 102629    |
| pJL1 mRFP1      | BBa_E1010       | This work              | 102630    |
| pJL1 eforRed    | BBa_K592012     | This work              | 106320    |
| pJL1 dTomato    | Addgene 54856   | This work              | 102631    |
| pJL1 mOrange    | Addgene 54751   | This work              | 102632    |
| pJL1 YPet       | Addgene 54860   | This work              | 102633    |
| pJL1 sfGFP      | Addgene 69496   | Jewett lab unpublished | 102634    |
| pJL1 mTFP1      | Addgene 54553   | This work              | 102635    |
| pJL1 CyPet      | Addgene 14030   | This work              | 102636    |
| pJL1 Aquamarine | Addgene 42889   | This work              | 106285    |
| pJL1 mTagBFP2   | Addgene 54572   | This work              | 102638    |
| pJL1 mKalama1   | Addgene 14892   | This work              | 102639    |
| pJL1 eBFP2      | Addgene 14891   | This work              | 102640    |

**Other Supplementary Materials for this manuscript include the following:**

**Curriculum S1. Let it glow!** This pre-lab assignment and lab protocol is designed to support the BioBits™ Bright tunable protein expression module with an optional inquiry-based extension activity.

**Curriculum S2. What factors affect CFPS yields?** This curriculum piece outlines an inquiry-based lab activity modeled on the BioBits™ Bright tunable protein expression lab. In this activity, students are guided through an independent investigation of biochemical factor(s) that influence *in vitro* protein synthesis yields.

**Curriculum S3. Synthetic biology: Looking to nature to engineer new designs.** This curriculum piece outlines a research project in which students are challenged to design and present a solution to a societal challenge of their choice using synthetic biology.

**Curriculum S4. How fast is it really?** This assignment, designed for high school math classrooms, asks students to calculate rates of transcription and translation.

**Curriculum S5. Super power protein!** This curriculum piece outlines a research project in which students have the opportunity to design their own super power after learning about some of the “super powers” (e.g., fluorescence) of proteins in biology. Students will present their super power and design an *in vitro* program that illustrates the super power *via* expression of fluorescent proteins in a 96-well plate.

**Data S1.** This file contains example student-generated fluorescence data from the tunable protein expression laboratory activity (Fig. 3) and includes time-course data for modeling protein synthesis as an enzymatic reaction with varying amounts of substrate (DNA template).

**Folder S1.** This folder contains FreeCAD files and circuit diagrams to enable user construction of portable imagers and incubators.
